# Supplementary material for: Isogambogenic acid induces apoptosis-independent autophagic cell death in human non-small-cell lung carcinoma cells
Source: PubMed Central journal article supplement — Sci Rep. 2015 Jan 9;5:7697. doi: 10.1038/srep07697 (PMC4287727; doi:10.1038/srep07697), 2015-01-09
Supplement: srep07697-s1.pdf [file srep07697-s1.pdf]

# Supplemental Material to:

## **Isogambogenic acid induces apoptosis-independent autophagic cell death in human Non-small-cell lung carcinoma cells**

Jianhong Yang<sup>a,†</sup>, Yongzhao Zhou<sup>b,†</sup>, Xia cheng<sup>a,†</sup>, Yi Fan<sup>a</sup>, Shichao He<sup>a</sup>, Shucui Li<sup>a</sup>, Haoyu Ye<sup>a</sup>, Caifeng Xie<sup>a</sup>,  
Wenshuang Wu<sup>a</sup>, Chunyan Li<sup>a</sup>, Heying Pei<sup>a</sup>, Luyuan Li<sup>c</sup>, Zhe Wei<sup>a</sup>, Aihua Peng<sup>a</sup>, Yuquan Wei<sup>a</sup>, Weimin Li<sup>b,\*</sup>,  
Lijuan Chen<sup>a,\*</sup>

<sup>a</sup>State Key Laboratory of Biotherapy/ Collaborative Innovation Center of Biotherapy and Cancer Center, West China Hospital of  
Sichuan University; Chengdu, China

<sup>b</sup>Department of Respiratory Medicine, West China Hospital of Sichuan University, Chengdu, China

<sup>c</sup>State Key Laboratory of Medicinal Chemical Biology and Nankai University College of Pharmacy, Tianjin, China

<sup>†</sup>These authors contributed equally to this work.

\*Address correspondence to: Lijuan Chen, State Key Laboratory of Biotherapy and Cancer Center,  
West China Hospital of Sichuan University; Chengdu, China, Email: chenlijuan125@163.com

Additional correspondence to: WeiMin Li, Department of Respiratory Medicine, West China  
Hospital of Sichuan University, Chengdu, China

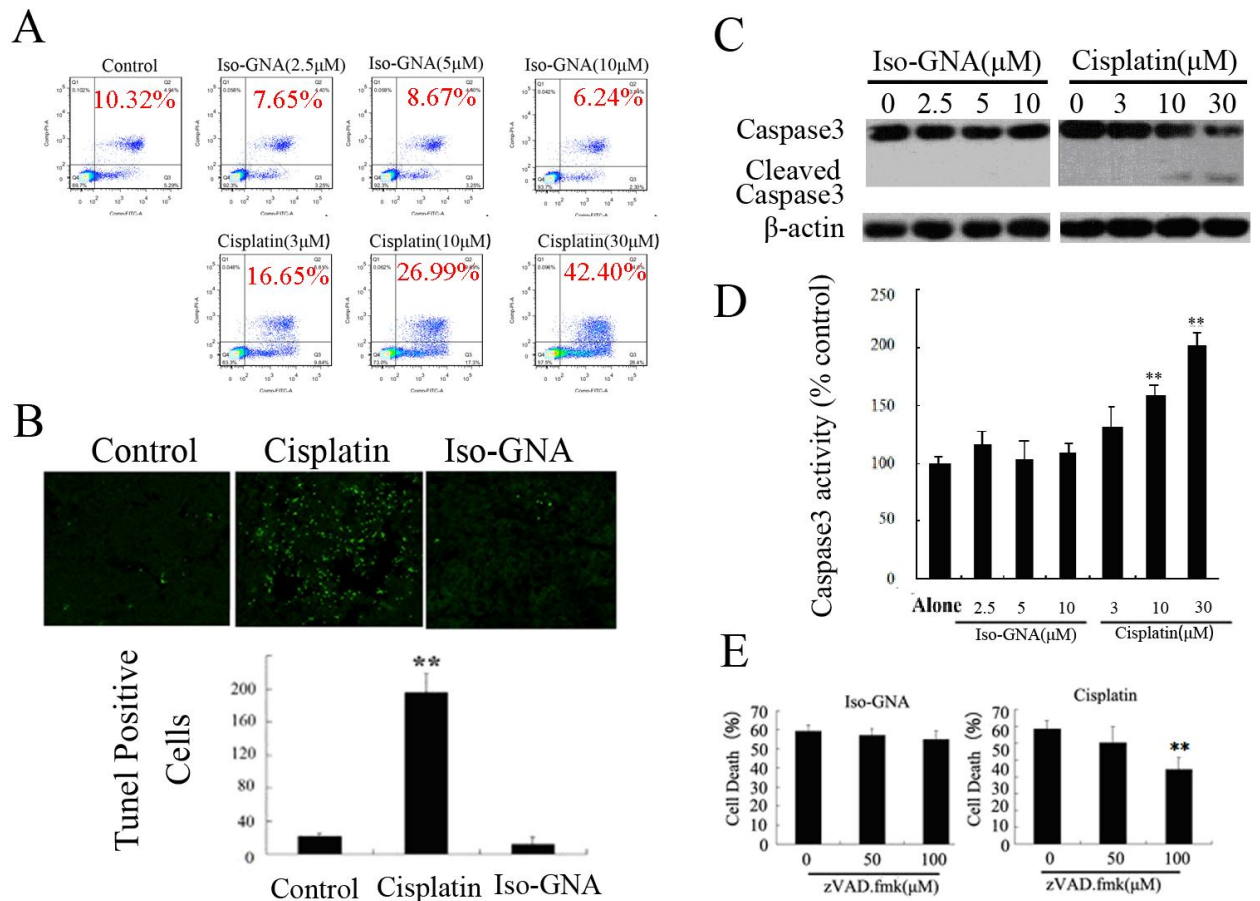

**Figure S1: Iso-GNA Induced Apoptosis-independent Cell Death.** (A) Apoptosis analysis: Approximately  $5 \times 10^5$  H460 cells were plated on 6-well plates for 24 h and then treated with indicated concentrations of iso-GNA or cisplatin for 24 h, then subjected to flow cytometry for analysis after stained with Annexin V-FITC/ PI. (B) Iso-GNA induces no apoptosis *in vivo*. TUNEL assay was performed to measure apoptotic cells in tumor sections from iso-GNA-, cisplatin- and vehicle-treated mice. \*\* $P < 0.01$ , as compared with the Control group. (C) Expression of caspase3 in H460 cells. Cells were treated with different concentrations of iso-GNA or cisplatin for 24 h, and then western blotting was performed to analyze caspase3 Expression. (D) Caspase3 activity in A549 cells. Cells were treated with different concentrations of iso-GNA or cisplatin for 24 h, and then subjected to analyze Caspase3 activity. \*\* $P < 0.01$ , as compared with the Control group. (E) Caspase-independent cell death caused by iso-GNA. Different concentrations of zVAD.fmk was added to A549 cells for 6 h before the cells were

treated with iso-GNA or cisplatin for 36 h, then cells were stained with trypan blue to analyze death rate. The data represents the means  $\pm$  s.d. of three independent tests.  $**p < 0.01$ , as compared with the control group.

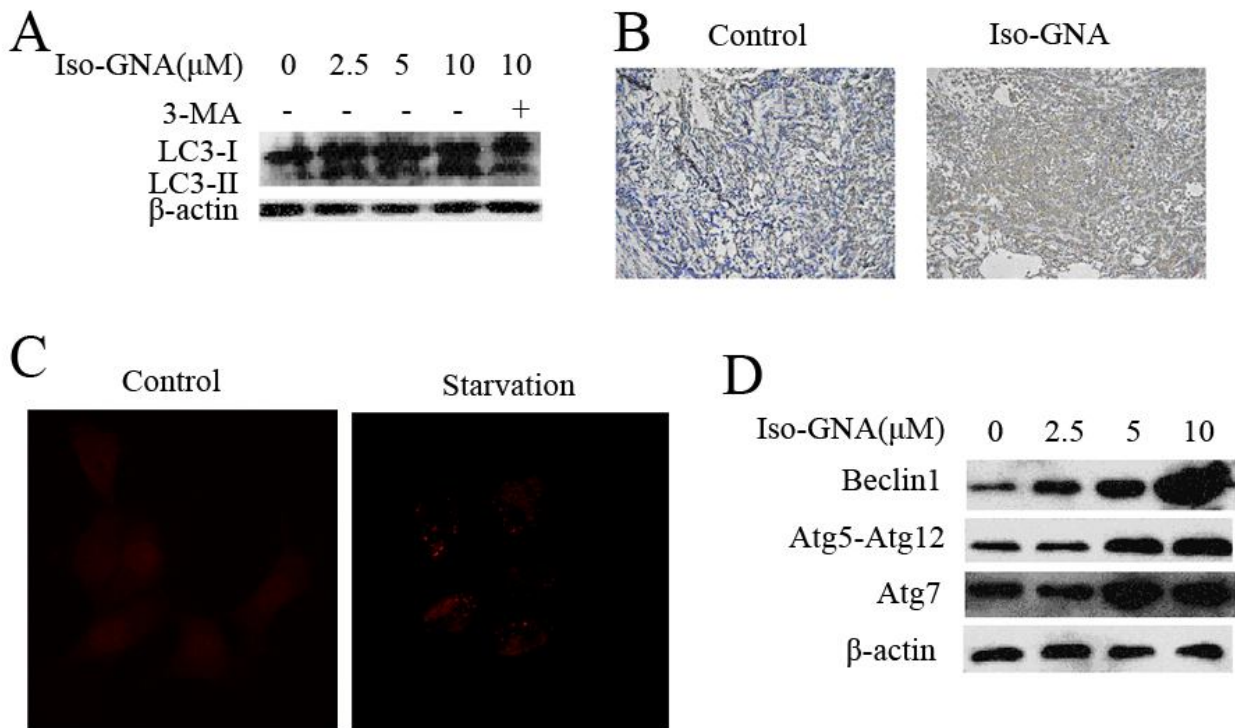

**Figure S2.** Iso-GNA induces autophagy *in vitro* and *in vivo*. (A) LC3 expression in H460 cells. Cells were treated with different concentrations of iso-GNA for 24 h, and 3-MA (2mM) was treated as an autophagy inhibitor. (B) Immunohistochemistry analysis of LC3 in A549 model tumor sections from iso-GNA-treated mice and vehicle-treated control. (C) Identification of stably expressing RFP-LC3 A549 cells. Cells were cultured in Earle's balanced salt solution with or without amino acids and fetal bovine serum, The formation of RFP-LC3 proteins was examined by fluorescence microscopy. (D) Beclin 1, Atg7 and Atg12-Atg5 complex expression in H460 cells treated with various concentrations of iso-GNA for 24h.

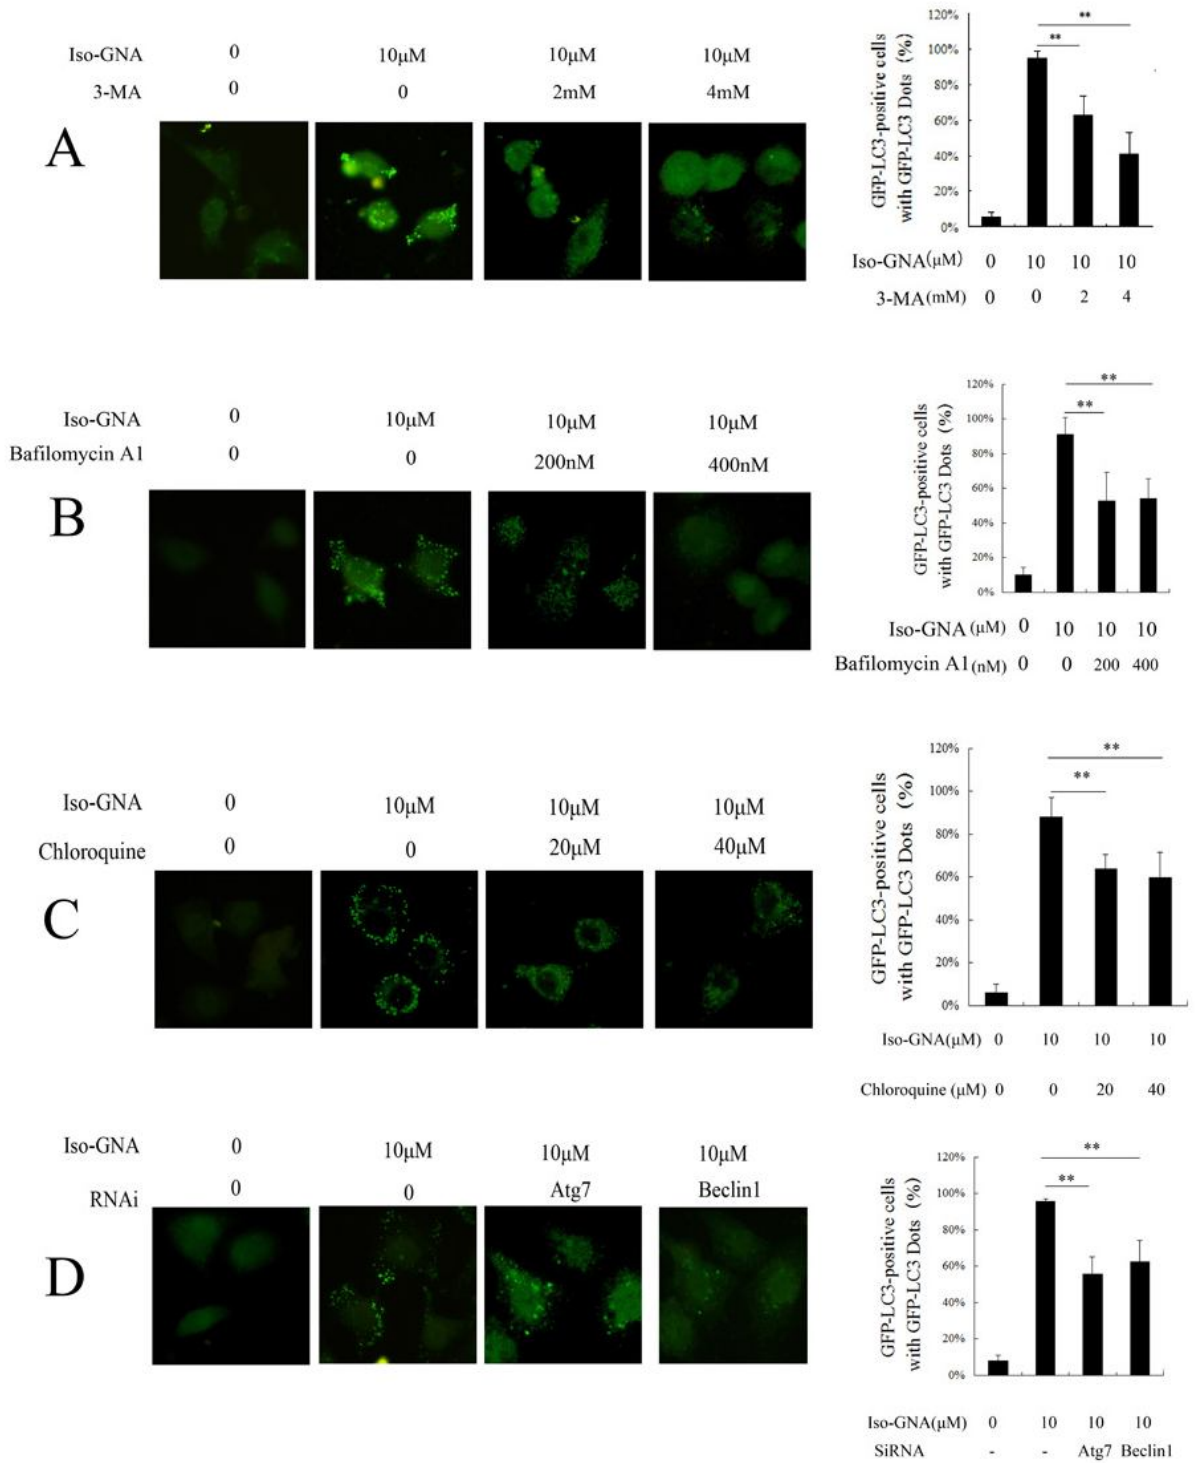

**Figure S3.** Autophagy induced by iso-GNA in A549 Cells was inhibited by autophagy inhibiting approaches. (A-D) A549 cells were transiently transfected with pEGFP-LC3 plasmid and treated with 0, 10  $\mu$ M Iso-GNA or in combination of Iso-GNA (10 $\mu$ M) with (A) 2 mM or 4mM 3-MA (B) 200nM or 400nM Bafilomycin A1 (C) 20 $\mu$ M or 40 $\mu$ M Chloroquine (D) *Atg7* or *Beclin1* SiRNA for 48 h. GFP-LC3 positive cells were defined as cells that have five or more GFP-LC3 punctate dots. The percentage of GFP-LC3 positive cells with GFP-LC3 dots and the

average number of GFP-LC3 dots per cell were assessed from 100 random fields. \*\*  $p < 0.01$ .

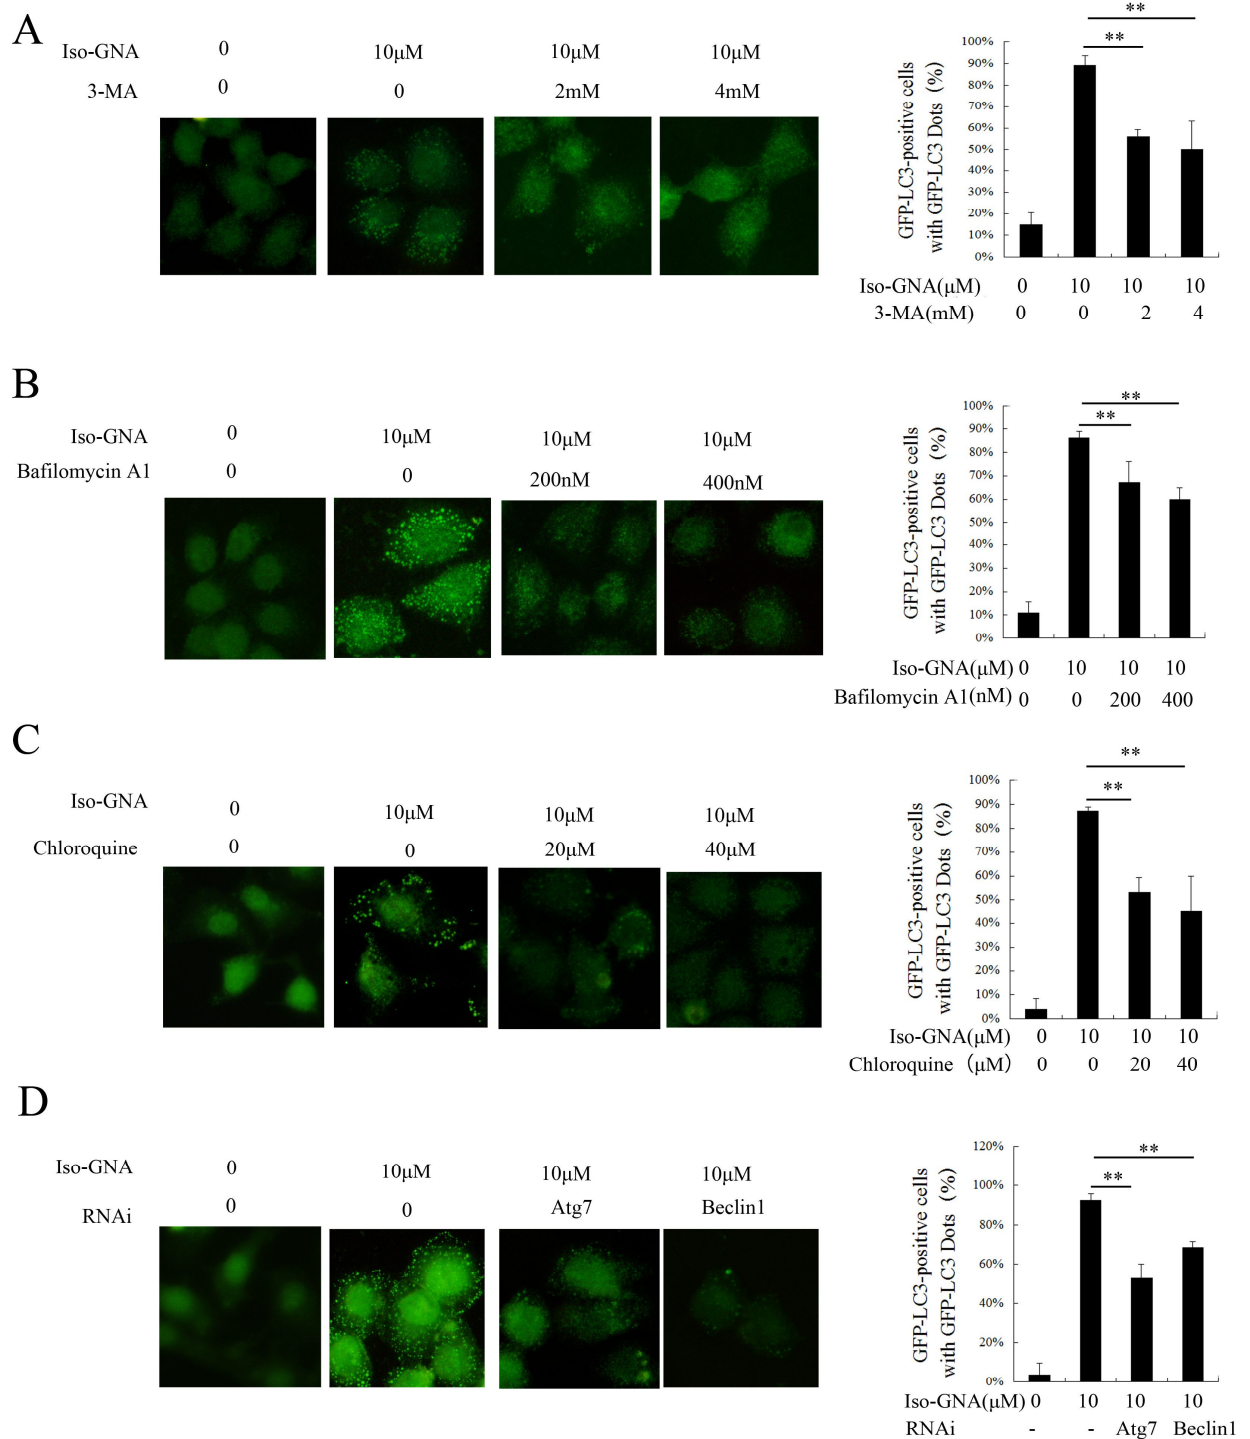

**Figure S4:** Autophagy induced by iso-GNA in H460 Cells was inhibited by autophagy inhibiting approaches.

(A-D) H460 cells were transiently transfected with pEGFP-LC3 plasmid and treated with 0, 10  $\mu$ M Iso-GNA or in combination of Iso-GNA (10 $\mu$ M) with (A) 2 mM or 4mM 3-MA (B) 200nM or 400nM Bafilomycin A1 (C) 20 $\mu$ M or 40 $\mu$ M Chloroquine (D) *Atg7* or *Beclin1* SiRNA for 48 h. GFP-LC3 positive cells were defined as cells that

have five or more GFP-LC3 punctate dots. The percentage of GFP-LC3 positive cells with GFP-LC3 dots and the average number of GFP-LC3 dots per cell were assessed from 100 random fields. \*\*  $p < 0.01$

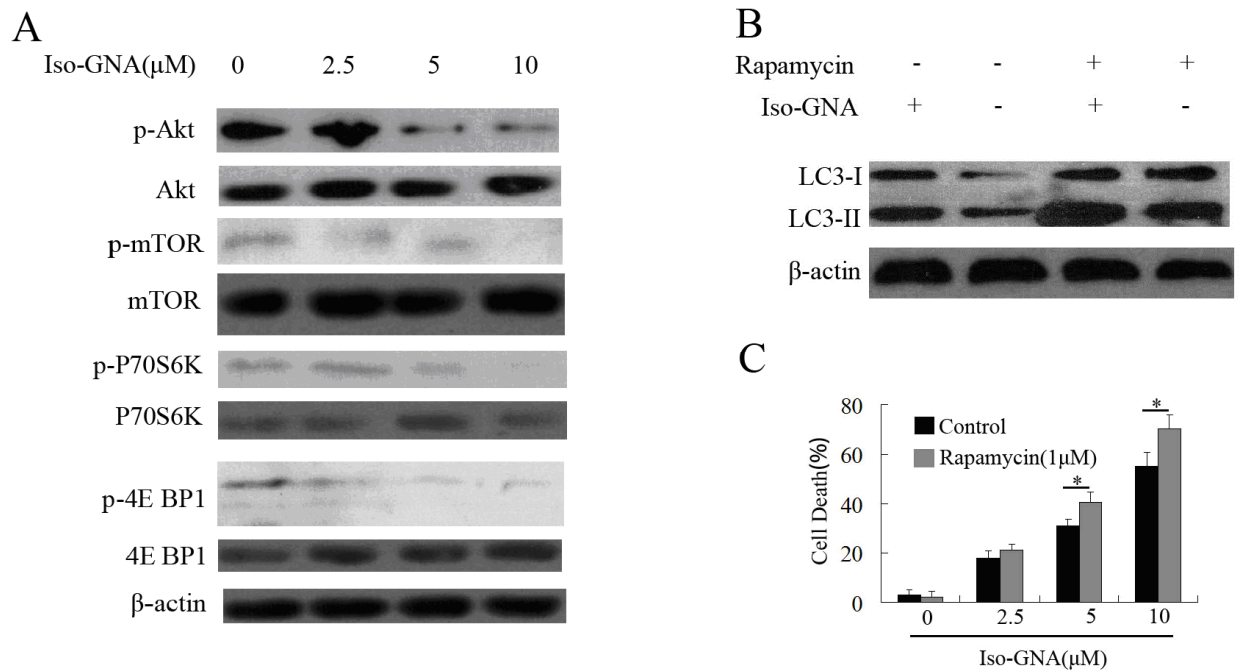

**Figure S5:** Iso-GNA induces autophagic cell death in H460 cells through Akt-mTOR-dependent signaling pathways. (A) Immunoblot analysis of phospho-Akt (S473), total Akt, phospho-mTOR (S2448), total mTOR, phospho-p70 S6K (S424/T421), total p70 S6K, phospho-4E-BP1 (S65/T70) and total 4E-BP1 from lysates of H460 cells treated with various concentrations of iso-GNA for 24 h. (B) H460 cells treated with 0, 1 $\mu$ M of rapamycin and/or 10  $\mu$ M Iso-GNA for 24 h were analyzed by western blot. (C) H460 cells were treated with 0, 2.5, 5 or 10  $\mu$ M iso-GNA and/or 1  $\mu$ M rapamycin for 24 h. Cell death was measured by trypan blue dye exclusion assay. \* $p < 0.05$ .

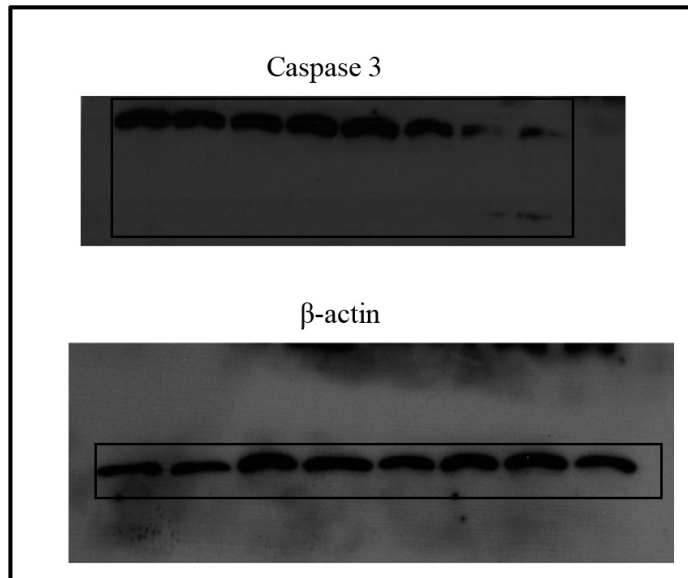

**Figure S6:** Complete western blotting gels from Fig. 2C.

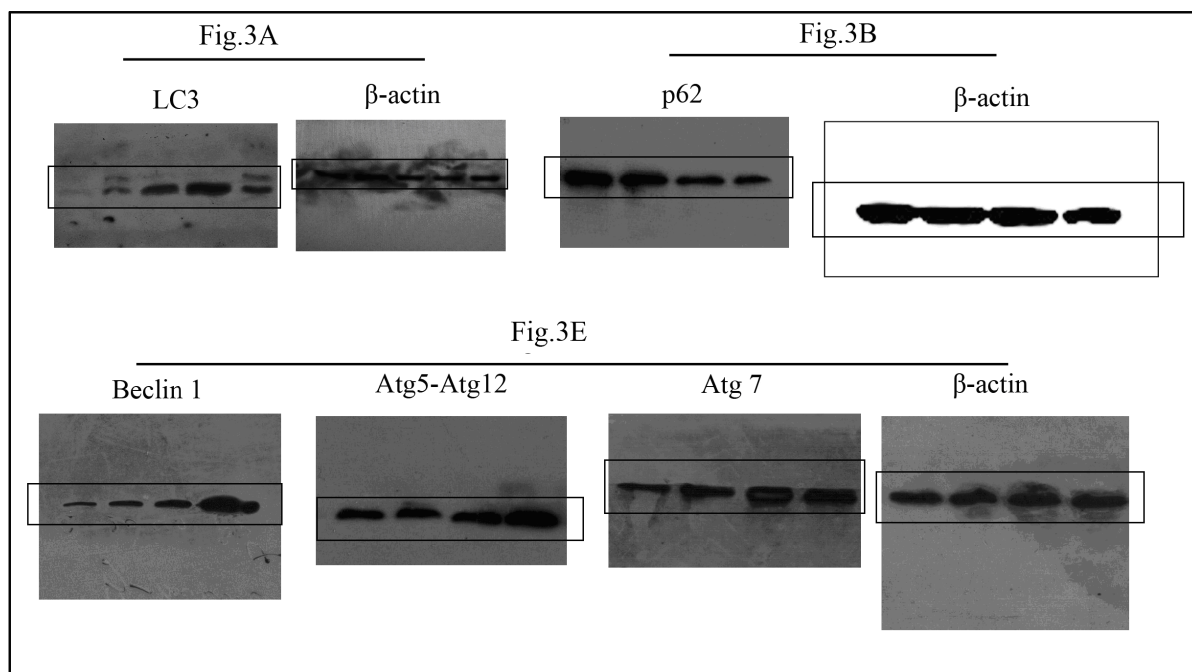

**Figure S7:** Complete western blotting gels from Fig. 3



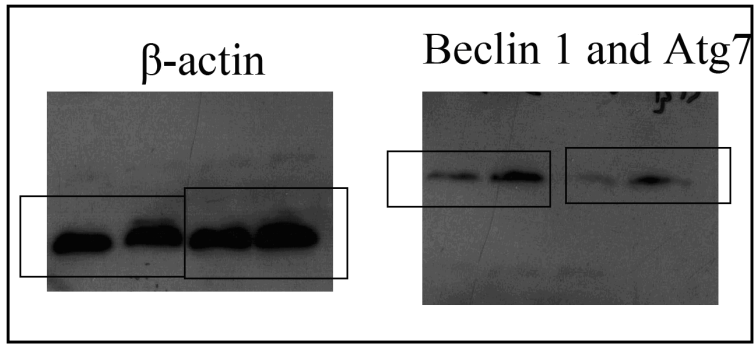

**Figure S8:** Complete western blotting gels from Fig. 4B.

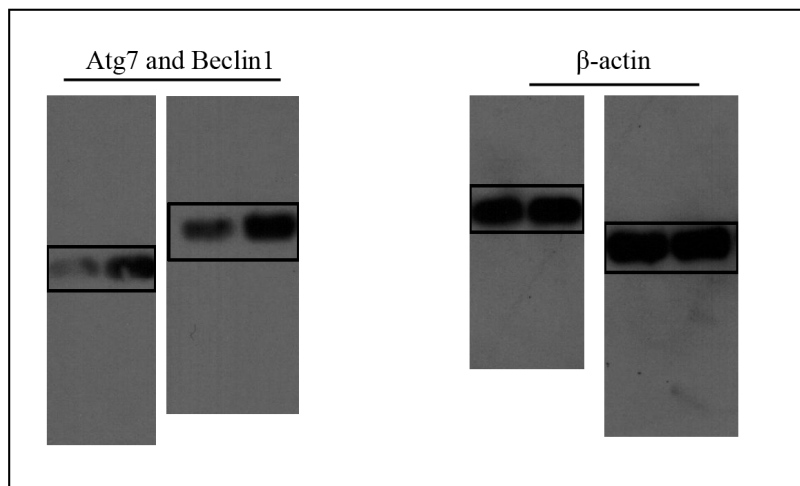

**Figure S9:** Complete western blotting gels from Fig. 5B.



Fig.6A

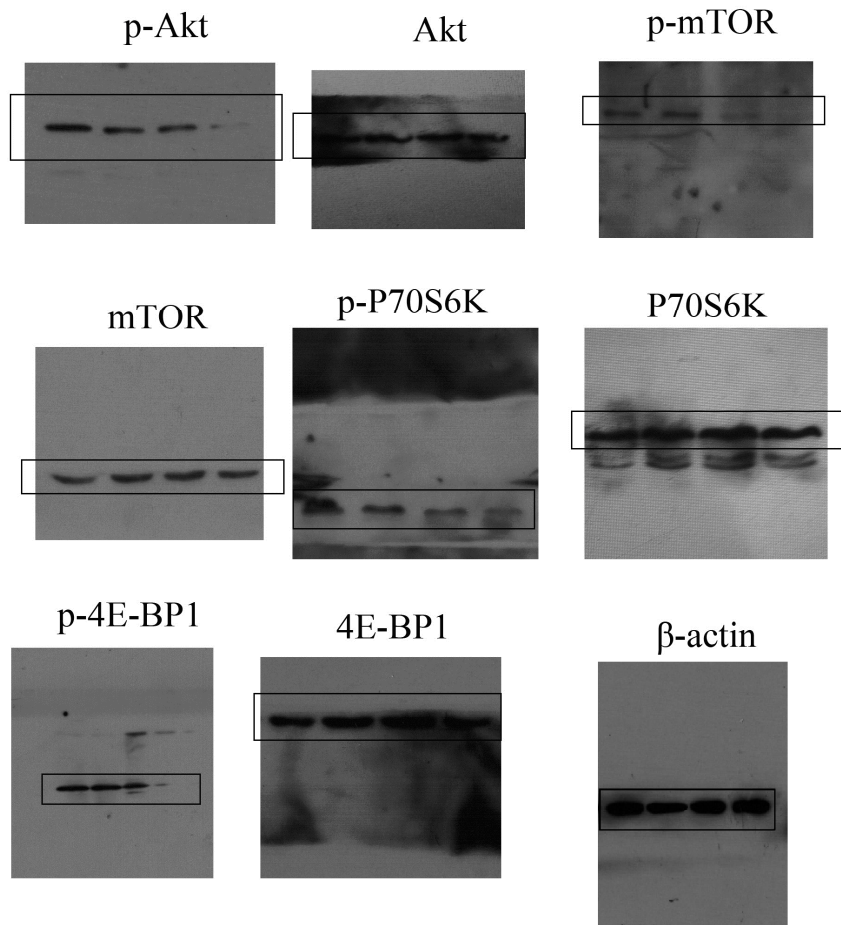

Fig.6B

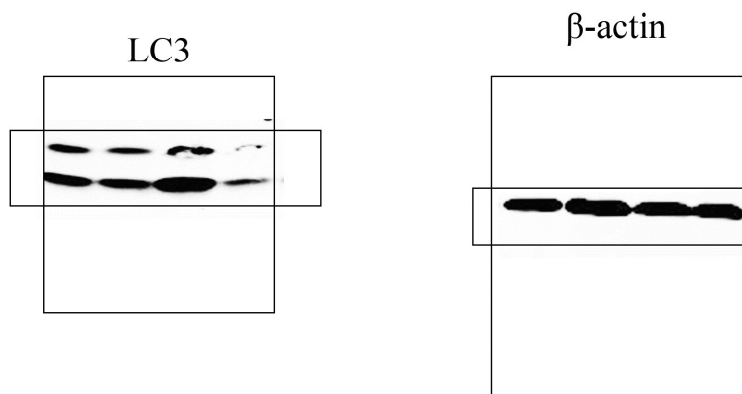

Figure S10: Complete western blotting gels from Fig. 6
